# Supplementary material for: Identification of Redeye, a new sleep-regulating protein whose expression is modulated by sleep amount
Source: eLife. 2014 Feb 4;3:e01473. doi: 10.7554/eLife.01473 (PMC3912633; doi:10.7554/eLife.01473)
Supplement: Figure 1—Source data 1. — DOI: http://dx.doi.org/10.7554/eLife.01473.004 [file elife01473s001.xlsx]

## Sheet: Figure 1A
				Measurements of Sleep Duration for all EMS Mutants: Figure1A_source_data
							Histogram
			EMS mutant line number	total sleep amount (m)			Bin Size (m)	Frequency
			140	538			250	0
			111	566			275	0
			133	477			300	1
			142	454			325	0
			23	476			350	1
			122	595			375	0
			159	720			400	0
			144	484			425	2
			110	484			450	4
			158	550			475	10
			337	520			500	14
			57	875			525	12
			92	564			550	16
			24	606			575	25
			119	771			600	41
			112	571			625	41
			156	1053			650	55
			134	562			675	71
			318	1293			700	93
			290	728			725	87
			12	852			750	111
			298	875			775	130
			10	864			800	146
			139	429			825	131
			52	289			850	110
			4	862			875	126
			113	1253			900	119
			10	841			925	104
			297	672			950	88
			334	791			975	77
			45	735			1000	49
			42	850			1025	43
			12	946			1050	25
			339	926			1075	32
			269	714			1100	21
			327	795			1125	20
			316	947			1150	6
			138	459			1175	12
			101	478			1200	16
			135	662			1225	3
			46	718			1250	2
			291	723			1275	8
			61	782			1300	3
			314	1024			1325	0
			63	1273			1350	1
			54	1292			More	1
			582	794			total	1857
			597	675
			598	1059
			600	762
			601	587
			612	810
			622	637
			625	731
			627	730
			643	650
			487	705
			502	746
			521	765
			524	645
			530	650
			549	909
			550	641
			560	739
			683	912
			691	910
			694	881
			861	990
			857	937
			858	765
			777	558
			849	882
			801	586
			951	765
			851	761
			882	941
			905	754
			894	1077
			968	509
			904	638
			910	786
			914	964
			907	729
			899	928
			941	742
			913	729
			946	685
			918	862
			888	771
			944	857
			956	630
			908	702
			953	808
			887	567
			899	745
			929	650
			911	713
			949	953
			962	658
			957	719
			934	766
			892	687
			984	820
			869	921
			982	795
			1047	792
			859	533
			1005	897
			1037	894
			980	922
			780	1118
			1060	668
			1070	860
			1061	715
			1062	811
			1063	782
			1064	688
			1067	784
			1069	774
			1068	765
			1071	736
			1072	695
			1073	810
			1074	595
			1077	722
			1076	739
			1079	692
			1078	700
			1080	757
			1081	802
			1082	650
			1085	663
			1086	776
			1087	783
			1088	1096
			1089	849
			1090	788
			1128	619
			1093	725
			1095	847
			1097	620
			1110	729
			1112	901
			1113	820
			1114	798
			1116	926
			1117	852
			1118	938
			1130	953
			1121	855
			1124	656
			1127	766
			1129	778
			1098	907
			1100	989
			1011	849
			1103	1116
			1092	993
			1096	1145
			1091	877
			1133	943
			1157	816
			1158	810
			1159	734
			1161	951
			1164	933
			1165	783
			1168	957
			1170	825
			1144	826
			1145	984
			1146	756
			1150	1031
			1151	836
			1153	884
			1155	908
			1156	552
			1136	1190
			1137	1137
			1138	1030
			1139	931
			1083	812
			1141	797
			1142	825
			1143	819
			1339	935
			1341	1002
			1350	973
			1344	819
			1345	861
			1347	780
			1343	766
			1352	770
			1353	873
			1354	939
			1355	943
			1361	1063
			1362	864
			1363	781
			1366	891
			1371	823
			1374	939
			1375	858
			1377	946
			1378	883
			1379	904
			1380	775
			1382	899
			1383	781
			1441	919
			1442	827
			1443	930
			1447	813
			1453	914
			1456	899
			1457	869
			1332	811
			1391	866
			1394	910
			1396	797
			1399	773
			1402	735
			1403	773
			1404	756
			1407	769
			1334	907
			1335	868
			1337	780
			1368	852
			1430	710
			1440	881
			1422	787
			1423	852
			1171	547
			1172	903
			1174	882
			1175	874
			1176	703
			1178	878
			1184	867
			1185	832
			1187	804
			1188	464
			1190	835
			1191	496
			1192	726
			1199	542
			1203	785
			1207	675
			1208	768
			1209	804
			1218	741
			1211	793
			1225	807
			1226	844
			1227	945
			1229	666
			1230	755
			1231	753
			1232	743
			1233	856
			1235	760
			1238	799
			1240	635
			1241	840
			1261	804
			1262	994
			1263	736
			1264	801
			1266	716
			1268	751
			1269	817
			1270	872
			1271	919
			1272	691
			1274	758
			1278	763
			1279	746
			1280	752
			1282	614
			1283	701
			1286	882
			1287	834
			1289	892
			1291	864
			1292	890
			1299	808
			1302	863
			1304	793
			1307	841
			1309	850
			1312	742
			1313	900
			1314	1058
			1315	922
			1319	809
			1320	793
			1246	842
			1249	837
			1250	969
			1251	1023
			1252	666
			1253	813
			1255	812
			1256	753
			1257	917
			1258	577
			1259	804
			1321	695
			1408	882
			1409	1073
			1411	953
			1414	992
			1415	846
			1419	806
			1420	935
			1427	890
			1561	655
			1567	748
			1581	676
			1582	818
			1588	621
			1589	797
			1590	648
			1591	566
			1593	734
			1595	678
			1597	812
			1624	803
			1626	943
			1629	785
			1637	811
			1638	750
			1570	846
		rye	1598	350
			1600	674
			1608	922
			1609	827
			1630	1016
			1635	691
			1566	871
			1564	727
			1632	748
			1634	781
			1639	705
			1576	1065
			1577	1073
			1645	842
			1650	676
			1657	683
			1592	1015
			1619	742
			1514	825
			1575	1007
			1620	761
			1640	855
			1643	807
			1647	936
			1655	776
			1658	840
			1562	1065
			1460	879
			1461	590
			1462	775
			1463	893
			1464	952
			1468	938
			1469	718
			1470	575
			1472	805
			1471	918
			1476	1061
			1466	917
			1465	893
			1474	847
			1480	831
			1481	840
			1484	828
			1485	829
			1488	576
			1489	692
			1492	830
			1493	836
			1494	539
			1495	792
			1497	699
			1499	728
			1501	694
			1506	795
			1508	774
			1509	786
			1511	958
			1512	794
			1515	665
			1516	723
			1517	789
			1524	933
			1525	830
			1528	616
			1531	1123
			1532	814
			1536	785
			1537	659
			1539	1070
			1545	643
			1547	822
			1548	640
			1551	597
			1659	929
			1599	970
			1613	813
			1607	856
			1589	845
			1580	844
			1623	812
			1605	756
			1552	806
			1553	788
			1555	754
			1556	757
			1557	676
			1558	776
			1559	801
			1496	910
			1660	954
			1661	789
			1663	687
			1666	688
			1667	883
			1668	751
			1672	713
			1673	617
			1678	924
			1680	907
			1683	690
			1684	781
			1685	781
			1686	699
			1687	824
			1688	969
			1693	935
			1691	587
			1702	857
			1737	777
			1741	762
			1747	792
			1748	754
			1749	671
			1750	844
			1752	920
			1587	681
			1604	814
			1622	896
			1762	1096
			1791	1051
			1810	977
			1823	853
			1826	728
			1839	823
			1842	1110
			1844	913
			1850	817
			1859	732
			1866	717
			1867	957
			1872	831
			1879	739
			1882	796
			1883	671
			1877	624
			1889	806
			1907	742
			1908	584
			1911	575
			1917	744
			1925	899
			1928	660
			1931	684
			1945	931
			1946	654
			2023	767
			1963	725
			2021	779
			2012	627
			2016	926
			1984	881
			1996	667
			2020	761
			2031	813
			2042	917
			1956	800
			1976	981
			2027	698
			2040	617
			2035	814
			2051	996
			2054	822
			2065	946
			2122	686
			2141	981
			2143	839
			2148	802
			2154	882
			2158	884
			2162	1062
			2176	921
			2186	930
			2200	901
			2208	853
			2219	639
			2231	454
			2241	1109
			2250	690
			2266	663
			2267	578
			2283	1270
			2302	979
			2317	743
			2322	983
			2404	602
			2429	786
			2437	560
			2446	629
			2453	914
			2466	548
			2396	823
			2474	789
			2478	703
			2482	838
			2497	632
			2498	819
			2499	706
			2504	754
			2519	721
			2520	585
			2538	741
			2543	931
			2552	1076
			2561	726
			2582	645
			2618	833
			2622	967
			2794	709
			2797	899
			2645	828
			2666	1071
			2699	761
			2701	762
			2731	657
			2670	605
			2745	567
			2748	508
			2842	912
			2851	875
			2864	973
			2661	683
			2652	686
			2733	1010
			2734	620
			2767	706
			2772	779
			2791	561
			2887	813
			2893	904
			2903	948
			2941	1278
			2967	882
			2974	793
			3007	683
			3010	807
			3015	815
			3023	868
			3024	929
			3030	641
			3032	896
			3042	884
			3036	789
			3054	762
			3070	659
			3098	706
			3099	795
			3107	869
			3153	685
			3158	721
			3159	678
			3160	773
			3162	629
			3168	933
			3170	639
			3171	967
			3173	886
			3180	990
			3184	1003
			3185	939
			3187	648
			3191	752
			3193	857
			3194	819
			3197	724
			3199	893
			3200	889
			3201	812
			3202	782
			3204	969
			3206	786
			3207	820
			3209	872
			3214	1042
			3216	783
			3217	852
			3218	867
			3219	958
			3220	795
			3221	932
			3223	923
			3242	1059
			3243	868
			3244	927
			3258	798
			3261	792
			3275	978
			3276	945
			3280	968
			3281	852
			3286	943
			3287	968
			3289	645
			3295	795
			3296	1163
			3299	944
			3300	914
			3301	864
			3302	910
			3304	777
			3306	883
			3313	841
			3315	967
			3316	805
			3319	637
			3323	785
			3326	824
			3327	842
			3342	795
			3343	795
			3344	795
			3350	950
			3368	921
			3374	714
			3376	922
			3377	702
			3399	754
			3405	690
			3414	860
			3421	811
			3429	664
			3432	741
			3440	892
			3441	1111
			3450	898
			3468	758
			3470	1086
			3476	1097
			3488	976
			3506	769
			3509	1070
			3518	1352
			3534	766
			3546	844
			3554	858
			3555	918
			3560	609
			3563	805
			3564	813
			3565	962
			3578	851
			3581	748
			3583	683
			3585	961
			3588	615
			3591	975
			3608	862
			3612	999
			3613	695
			3616	837
			3621	667
			3630	790
			3566	868
			3576	818
			3579	766
			3641	736
			3649	676
			3658	839
			3659	478
			3673	788
			3675	785
			3686	784
			3714	963
			3719	876
			3726	947
			3737	935
			3741	990
			3749	1093
			3750	1009
			3753	858
			3758	900
			3759	1087
			3760	748
			3764	818
			3769	853
			3771	978
			3777	899
			3781	892
			3785	991
			3798	989
			3800	798
			3803	989
			3806	791
			3807	583
			3809	1012
			3820	885
			3821	820
			3822	909
			3823	934
			3831	903
			3832	1218
			3835	1053
			3838	938
			3843	1022
			3847	996
			3852	708
			3901	594
			3902	756
			3928	756
			3875	712
			3880	794
			3891	819
			3899	911
			3931	968
			3941	656
			3962	759
			3982	623
			3987	789
			3989	653
			4012	736
			4016	830
			4026	664
			4035	791
			4038	893
			4041	920
			4043	420
			4045	771
			4050	918
			4054	772
			4057	961
			4115	641
			4117	946
			4118	707
			4128	659
			4150	838
			4161	890
			4163	749
			4075	696
			4076	771
			4183	729
			4187	685
			4088	780
			4089	585
			4093	785
			4107	734
			4111	657
			4179	778
			4180	621
			4181	846
			4185	751
			4189	847
			4195	732
			4197	851
			4198	942
			4205	704
			4208	711
			4224	668
			4238	602
			4246	875
			4248	845
			4253	686
			4258	743
			4262	786
			4263	890
			4264	827
			4265	1199
			4270	843
			4272	917
			4280	811
			4281	593
			4288	705
			4289	778
			4306	859
			4307	835
			4320	842
			4321	999
			4323	772
			4327	870
			4328	834
			4331	613
			4332	772
			4337	847
			4341	884
			4346	826
			4347	793
			4350	756
			4354	743
			4355	757
			4356	844
			4357	788
			4358	749
			4362	813
			4363	867
			4368	721
			4377	703
			4372	440
			4374	653
			4380	600
			4383	708
			4387	779
			4388	659
			4403	834
			4421	718
			4429	870
			4432	657
			4436	750
			4441	659
			4447	947
			4449	927
			4453	773
			4464	658
			4473	906
			4476	592
			4491	863
			4493	934
			4496	1085
			4501	770
			4503	866
			4506	1010
			4507	920
			4517	1181
			4533	680
			4535	860
			4549	885
			4551	809
			4557	745
			4560	746
			4561	912
			4562	828
			4564	799
			4675	949
			4678	904
			4691	959
			4720	995
			4743	885
			4766	895
			4773	880
			4801	883
			4824	889
			4833	921
			4857	620
			4873	977
			4874	957
			4883	652
			4884	797
			4893	767
			4913	871
			4865	797
			4872	999
			4891	922
			4915	772
			4918	895
			4919	1018
			4934	917
			4936	930
			4941	914
			4954	891
			4957	879
			4958	798
			4962	754
			4971	883
			4978	928
			4981	880
			4983	750
			4984	894
			4985	861
			4986	737
			4987	943
			4989	747
			4990	848
			4995	689
			4996	827
			4997	612
			4998	937
			5001	737
			5004	823
			5007	878
			5008	807
			5009	910
			5014	803
			5015	829
			5020	793
			5022	775
			5026	856
			5005	774
			5017	882
			5128	1065
			5129	866
			5132	1124
			5133	1017
			5137	1039
			5138	971
			5141	967
			5144	980
			5146	1071
			5147	960
			5148	1071
			5149	1035
			5150	1085
			5151	1123
			5153	1044
			5154	1054
			5155	1015
			5156	1111
			5159	1178
			5160	1072
			5162	1009
			5164	1030
			5167	1102
			5173	1068
			5174	965
			5175	913
			5122	1028
			5178	1027
			5179	1011
			5180	1010
			5181	953
			5185	1019
			5230	965
			5257	1100
			5267	1114
			5271	1158
			5273	1176
			5276	964
			5280	1122
			5281	1093
			5294	1183
			5295	1158
			5298	1085
			5299	1149
			5305	1027
			5306	910
			5315	677
			5316	743
			5317	744
			5319	703
			5320	773
			5321	821
			5322	756
			5323	733
			5326	691
			5327	768
			5324	926
			5330	700
			5331	903
			5333	839
			5334	814
			5335	786
			5337	921
			5338	803
			5339	760
			5340	860
			5343	678
			5345	834
			5346	917
			5347	746
			5348	939
			5349	837
			5351	917
			5352	919
			5353	866
			5358	883
			5359	946
			5361	863
			5362	791
			5363	864
			5364	886
			5365	1004
			5366	848
			5368	977
			5369	774
			5370	838
			5371	882
			5372	848
			5373	807
			5374	747
			5375	863
			5379	757
			5380	772
			5381	786
			5382	921
			5383	714
			5386	906
			5388	655
			5390	749
			5391	855
			5392	969
			5393	907
			5398	925
			5402	791
			5407	678
			5409	761
			5411	992
			5413	865
			5416	748
			5417	977
			5418	1016
			5021	919
			5026	660
			5029	877
			5046	1081
			5056	943
			5059	936
			5072	1053
			5077	1006
			5081	844
			5086	1030
			5087	960
			5090	1060
			5093	1010
			5098	750
			5099	903
			5104	969
			5105	902
			5110	1092
			5112	1036
			5123	943
			5124	1046
			5125	952
			5127	939
			5032	608
			5037	956
			5042	963
			5050	1268
			5055	1176
			5064	968
			5068	875
			5071	1124
			5074	1064
			5079	1090
			5084	1003
			5085	982
			5095	783
			5114	954
			5116	1009
			5120	975
			5187	1028
			5188	1019
			5191	928
			5135	999
			5136	939
			5139	905
			5140	1003
			5157	793
			5158	906
			5182	925
			5195	970
			5198	946
			5202	1028
			5205	884
			5209	1063
			5211	948
			5216	879
			5217	946
			5219	821
			5222	896
			5223	1021
			5224	913
			5225	1036
			5226	983
			5227	823
			5232	883
			5234	953
			5235	1134
			5238	1038
			5239	1037
			5246	1230
			5247	1167
			5248	1238
			5252	1260
			5253	1184
			5255	1176
			5256	1220
			5203	901
			5210	1150
			5213	1116
			5419	729
			5430	896
			5431	1007
			5434	927
			5440	704
			5436	826
			5438	789
			5441	849
			5444	786
			5445	1035
			5447	937
			5449	686
			5450	782
			5455	649
			5456	836
			5457	724
			5466	779
			5467	860
			5468	640
			5470	752
			5473	742
			5474	918
			5475	774
			5476	836
			5477	853
			5479	880
			5480	845
			5481	732
			5485	876
			5694	760
			5703	1105
			5714	1013
			5715	723
			5727	801
			5733	867
			5736	1121
			5753	869
			5754	830
			5760	1081
			5764	1263
			5969	954
			5776	1145
			5779	826
			5783	1348
			5709	846
			5738	998
			5797	869
			5820	502
			5829	807
			5835	676
			5839	762
			5845	948
			5862	770
			5884	796
			5790	1000
			5793	841
			5796	858
			5799	804
			5800	897
			5814	719
			5816	831
			5817	832
			5820	681
			5825	721
			5826	863
			5830	816
			5833	847
			5848	580
			5857	813
			5864	801
			5874	615
			5883	547
			5884	841
			5885	881
			5718	848
			5728	665
			5752	525
			5756	772
			5899	797
			5913	1111
			5949	837
			5964	1012
			5966	882
			5530	905
			5558	776
			5563	908
			5566	701
			5588	703
			5589	772
			5591	963
			5593	922
			5594	893
			5606	854
			5607	579
			5610	776
			5611	846
			5615	830
			5623	765
			5625	1002
			5629	790
			5634	739
			5643	497
			5644	637
			5645	891
			5660	907
			5670	770
			5804	797
			5865	871
			5878	735
			5879	984
			5881	754
			5730	730
			5903	815
			5908	795
			5915	870
			5933	1166
			5943	804
			5959	914
			5965	1151
			5970	843
			6012	827
			6013	843
			6014	912
			6023	989
			6027	801
			6030	807
			6037	554
			6046	822
			6048	809
			6062	919
			6063	719
			6070	824
			6078	588
			6079	794
			6081	471
			6085	757
			6031	655
			6043	757
			6052	749
			6054	984
			6055	628
			6059	737
			6000	682
			6005	945
			6086	1018
			6096	768
			6103	1151
			6106	858
			6113	951
			6116	730
			6122	828
			6124	576
			6130	747
			6131	731
			6133	930
			6134	786
			6140	854
			6141	959
			6147	689
			6149	848
			6162	857
			6164	796
			6168	787
			6169	514
			6178	769
			6180	771
			6181	895
			6184	1046
			6187	789
			6194	569
			6198	686
			6199	773
			6204	687
			6207	720
			6212	773
			6216	998
			6218	802
			6222	627
			6223	699
			6228	846
			6245	558
			6246	588
			6256	934
			6278	731
			6282	723
			6286	730
			6287	654
			6290	598
			6293	802
			6294	793
			6302	714
			6304	688
			6321	716
			6322	790
			6338	966
			6350	801
			6351	834
			6355	819
			6375	827
			6380	569
			6381	667
			6400	660
			6409	815
			6416	887
			6429	845
			6435	732
			6387	788
			6391	867
			6394	891
			6397	672
			6403	670
			6404	658
			6410	888
			6419	905
			6438	646
			6443	658
			6444	744
			6448	931
			6449	594
			6453	715
			6462	866
			6468	880
			6473	726
			6576	767
			6577	910
			6587	887
			6595	439
			6597	614
			6603	726
			6622	488
			6623	566
			6625	612
			6710	863
			6717	601
			6718	750
			6724	896
			6731	652
			6737	659
			6741	775
			6746	754
			6750	665
			6756	863
			6757	740
			6773	650
			6775	789
			6787	775
			6788	498
			6792	614
			6796	768
			6799	870
			6803	817
			6485	694
			6486	967
			6501	1177
			6502	908
			6503	693
			6507	996
			6510	966
			6553	665
			6519	901
			6528	760
			6530	1256
			6559	1011
			6562	891
			6810	784
			6811	762
			6816	923
			6818	794
			6819	869
			6825	902
			6808	762
			6826	786
			6829	662
			6830	836
			6832	803
			6833	877
			6837	824
			6843	701
			6844	771
			6846	724
			6847	865
			6849	560
			6853	815
			6854	886
			6869	654
			6870	613
			6875	881
			6877	639
			6879	1120
			6884	799
			6885	989
			6889	820
			6890	860
			6891	750
			6892	775
			6893	956
			6902	775
			6858	789
			6871	656
			7089	698
			7097	692
			7098	514
			7102	683
			7110	642
			7115	751
			7125	765
			7132	951
			7133	892
			7139	796
			7148	743
			7151	816
			7154	573
			7166	857
			7167	597
			7171	532
			7174	677
			7175	640
			7181	799
			7188	907
			7194	840
			7203	792
			7207	818
			7216	808
			7223	830
			7232	554
			7233	959
			7234	780
			7237	853
			7238	718
			7239	582
			7243	736
			7244	891
			7245	747
			7251	503
			7254	888
			7257	863
			7264	622
			7265	725
			7267	871
			7276	602
			7277	548
			7280	679
			7281	915
			7285	812
			7291	468
			7297	740
			7304	854
			7306	850
			7310	929
			7322	844
			7335	701
			7341	746
			7344	984
			7347	617
			7356	727
			7358	588
			7364	734
			7386	659
			7392	852
			7396	649
			7397	960
			7413	974
			7421	927
			7444	989
			7450	822
			7452	960
			7453	938
			7466	959
			7471	920
			7423	787
			7424	1265
			7425	850
			7429	839
			7433	593
			7438	737
			7440	682
			7443	699
			7486	560
			7496	708
			7499	770
			7500	732
			7503	796
			7509	882
			7511	631
			7518	697
			7520	696
			7524	511
			7526	665
			7573	790
			7529	511
			7537	496
			7539	629
			7546	659
			7549	602
			7552	684
			7553	957
			7556	591
			7568	614
			7571	655
			7573B	662
			7476	486
			7480	459
			7487	672
			7495	688
			7513	752
			7514	641
			7523	410
			7535	583
			7536	520
			7543	609
			7545	856
			7548	693
			7560	795
			7566	745
			7577	974
			7579	749
			7580	690
			7581	842
			7609	788
			7614	776
			7632	937
			7589	882
			7591	1156
			7606	865
			7611	917
			7645	684
			7647	1056
			7662	972
			7778	883
			7782	712
			7786	786
			7802	916
			7808	1085
			7819	698
			7821	590
			7834	975
			7841	840
			7846	892
			7850	888
			7856	905
			7857	563
			7882	784
			7888	817
			7897	959
			7907	1026
			7914	714
			7936	698
			7681	1056
			7684	908
			7687	741
			7701	632
			7737	965
			7765	951
			7676	917
			7690	709
			7698	626
			7722	800
			7732	895
			7739	906
			7762	1155
			7689	1015
			7677	798
			7766	676
			7736	1099
			7972	705
			7985	633
			7992	544
			7998	827
			8009	445
			8011	1011
			8020	966
			8027	847
			8041	849
			8042	592
			8044	543
			8049	663
			8054	838
			8056	1028
			8059	930
			8062	1013
			8067	467
			8167	730
			8076	955
			8079	930
			8160	729
			8159	948
			8150	988
			8149	873
			8147	608
			8143	802
			8134	694
			8131	929
			8123	881
			8112	768
			8111	707
			8102	816
			8101	968
			8098	950
			8096	824
			8094	895
			8092	834
			8090	863
			8080	770
			8170	687
			8172	583
			8174	592
			8176	583
			8183	763
			8184	768
			8185	805
			8191	704
			8196	821
			8207	886
			8209	897
			8216	582
			8226	624
			8234	781
			8248	688
			8255	798
			8212	651
			8243	816
			8272	874
			8331	1073
			8322	776
			8342	717
			8341	680
			8336	1031
			8348	798
			8347	873
			8360	857
			8487	1020
			8491	867
			8492	913
			8507	911
			8514	878
			8536	717
			8539	695
			8541	896
			8281	872
			8280	859
			8297	806
			8296	856
			8321	648
			8320	1112
			8313	629
			8311	1000
			8433	819
			8447	918
			8413	707
			8416	1183
			8420	883
			8423	755
			8446	699
			8605	649
			8588	801
			8568	541
			8583	755
			8617	874
			8657	855
			8646	652
			8650	658
			8725	739
			8720	873
			8738	890
			8735	694
			8704	598
			8718	734
			8676	951
			8671	803
			8682	805
			8697	871
			8724	720
			8714	697
			8728	788
			8794	759
			8817	690
			8819A	776
			8820	724
			8819B	868
			8622	791
			8632	589
			8838	704
			8870	897
			8875	807
			8876	874
			8877	708
			8880	749
			8881	550
			8882	713
			8887	613
			8898	861
			8905	637
			8911	649
			8924	989
			8927	1156
			8933	646
			8945	672
			8962	688
			8602	806
			8700	1198
			8983	498
			8988	627
			8992	702
			9007	712
			9009	749
			9012	630
			9018	755
			9023	690
			9039	723
			9042	851
			9044	790
			9045	645
			9051	553
			9052	515
			9064	912
			8663	823
			8629	899
			8643	710
			8753	1018
			8837	754
			8852	606
			8839	821
			8844	864
			8833	680
			8841	721
			8854	777
			8980	469
			8991	887
			8997	755
			9005	707
			9019	1017
			9021	874
			9172	635
			9191	867
			9197	904
			9198	740
			9202	735
			9205	926
			9209	660
			9223	856
			9241	873
			9246	804
			9248	914
			9258	733
			9262	758
			9264	887
			9267	761
			9171	744
			9176	694
			9177	773
			9183	834
			9215	587
			9237	1095
			9242	985
			9271	694
			9278	623
			9280	699
			9281	635
			9285	757
			9306	1020
			9317	780
			9324	750
			9326	699
			9328	670
			9336	950
			9342	755
			9350	926
			9352	553
			9353	823
			9363	993
			9282	1033
			9297	904
			9300	601
			9069	895
			9087	692
			909	797
			9092	805
			9093	890
			9095	694
			9102	706
			9108	882
			9117	859
			9140	669
			9142	880
			9143	1021
			9167	744
			9124	621
			9135	946
			9114	871
			9127	981
			9392	956
			9368	810
			9374	784
			9383	867
			9406	887
			9409	840
			9377	711
			9397	903
			9402	748
			9405	889
			9416	1051
			9485	635
			9493	973
			9454	736
			9487	1101
			9489	763
			9492	1187
			9516	959
			9375	932
			9398	691
			9505	1029
			9598	862
			9608	491
			9538	535
			9543	1188
			9605	806
			9547	882
			9585	822
			9604	724
			9616	880
			9529	735
			9494	583
			9653	767
			9693	971
			9709	874
			9647	1160
			9649	652
			9674	730
			9675	791
			9696	765
			9631	719
			9705	604
			9623	768
			9637	548
			9689	469
			9684	1192
			9727	756
			9743	665
			9752	937
			9756	693
			9740	900
			9599	807
			9476	673
			9707	913
			9854	1063
			9817	882
			9882	626
			9885	715
			9906	1218
			9916	1168
			9933	1190
			9891	1001
			9910	1071
			9941	791
			9964	1086
			9889	907
			9894	852
			average	819.325
			s.d	149.132

## Sheet: 1C&1D iso controls
					Sleep Analysis of rye mutants: Figure1C_1D_source_data
			Sleep Analysis of iso controls
raw data										average value for single animal
Day#	animal#	total sleep(m)	daytime	nighttime	activity index	daytime episode length	daytime episode number	nighttime episode length	nighttime episode number	animal#	total	daytime	nighttime	d episode L	d episode n	n episode l	n episode n
1	1	805	192	613	1.4795	10.6667	18	55.7273	11	1	809	242.6	566.4	24.1658	11.6	39.9374	17
	2	980	312	668	0.984749	17.3333	18	95.4286	7	2	905	285.6	619.4	12.7071	23	82.5357	8
	3	688	141	547	1.43941	5.03571	28	39.0714	14	3	792.4	248	544.4	10.6375	24.2	35.1604	15.8
	4	942	290	652	1.41046	24.1667	12	130.4	5	4	1006.4	366.4	640	29.4083	13.2	100.011	7.4
	5	933	263	670	1.37747	14.6111	18	223.333	3	5	904.2	262.8	641.4	17.5848	15	127.167	6
	6	858	251	607	0.984509	11.9524	21	50.5833	12	6	881	305.8	575.2	15.989	19.2	35.7951	17
	7	856	261	595	1.04631	10.44	25	54.0909	11	7	775.2	222.6	552.6	8.84014	25.2	38.8721	15.6
	8	1023	322	701	0.913462	18.9412	17	701	1	8	923.6	274.8	648.8	19.5593	15.4	197.692	8
	9	800	208	592	1.44131	20.8	10	74	8	9	694.2	124.6	569.6	10.2043	14.2	47.5818	13
	10	928	289	639	1.36791	16.0556	18	159.75	4	10	796	262.8	533.2	16.4614	16.4	54.3975	15.4
	11	867	241	626	1.16434	8.60714	28	62.6	10	11	809.4	228.2	581.2	19.4714	15.6	49.6978	12
	12	948	281	667	0.979633	11.7083	24	111.167	6	12	905.2	269.8	635.4	10.1967	27	74.5957	9.8
	13	831	254	577	1.89309	23.0909	11	32.0556	18	13	1013	378.6	634.4	52.3052	8	69.6754	12.4
	14	739	132	607	1.13	6.94737	19	67.4444	9	14	821.4	205	616.4	17.0857	16.4	71.477	9.4
	15	822	252	570	1.13128	14.8235	17	63.3333	9	15	891	287	604	21.728	13.6	66.6958	9.2
2	1	825	252	573	1.59935	31.5	8	28.65	20
	2	788	210	578	1.05223	11.0526	19	48.1667	12
	3	764	195	569	1.26627	8.125	24	40.6429	14
	4	951	313	638	1.16393	16.4737	19	58	11
	5	966	294	672	1.14376	19.6	15	96	7
	6	830	293	537	1.37603	15.4211	19	25.5714	21
	7	759	242	517	1.14391	8.34483	29	27.2105	19
	8	913	279	634	0.980989	15.5	18	70.4444	9
	9	705	109	596	1.24796	6.8125	16	42.5714	14
	10	811	286	525	1.22452	23.8333	12	26.25	20
	11	832	290	542	1.53707	24.1667	12	41.6923	13
	12	877	275	602	0.898757	10.1852	27	50.1667	12
	13	1103	412	691	2.25223	58.8571	7	172.75	4
	14	803	156	647	1.17896	7.42857	21	107.833	6
	15	744	161	583	1.23165	13.4167	12	72.875	8
3	1	852	225	627	1.60884	18.75	12	69.6667	9
	2	851	257	594	1.00679	10.28	25	74.25	8
	3	789	258	531	1.23963	9.92308	26	33.1875	16
	4	943	342	601	1.21529	34.2	10	66.7778	9
	5	933	350	583	1.18935	25	14	72.875	8
	6	826	258	568	0.996743	14.3333	18	27.0476	21
	7	768	167	601	1.13115	7.26087	23	54.6364	11
	8	949	321	628	0.997963	35.6667	9	57.0909	11
	9	678	98	580	1.12336	5.76471	17	30.5263	19
	10	733	206	527	1.14144	12.1176	17	31	17
	11	837	254	583	1.37811	42.3333	6	41.6429	14
	12	947	285	662	0.868154	10.9615	26	110.333	6
	13	1061	424	637	1.87071	84.8	5	45.5	14
	14	947	317	630	1.31846	45.2857	7	63	10
	15	887	276	611	0.909584	18.4	15	61.1	10
4	1	758	274	484	1.52786	39.1429	7	20.1667	24
	2	935	319	616	1.01782	13.8696	23	88	7
	3	830	304	526	1.07049	13.8182	22	26.3	20
	4	1083	433	650	1.16527	30.9286	14	162.5	4
	5	868	253	615	1.27972	16.8667	15	76.875	8
	6	907	323	584	1.04511	19	17	41.7143	14
	7	666	182	484	1.06072	7.28	25	23.0476	21
	8	829	232	597	0.94599	15.4667	15	45.9231	13
	9	624	71	553	1.19387	3.94444	18	50.2727	11
	10	798	322	476	0.978159	17.8889	18	23.8	20
	11	741	180	561	1.28612	11.25	16	43.1538	13
	12	896	282	614	0.723757	11.28	25	43.8571	14
	13	1039	403	636	1.7182	44.7778	9	53	12
	14	706	134	572	1.20572	6.7	20	40.8571	14
	15	1086	441	645	0.861582	31.5	14	80.625	8
5	1	805	270	535	1.50866	20.7692	13	25.4762	21
	2	971	330	641	0.950855	11	30	106.833	6
	3	891	342	549	1.00364	16.2857	21	36.6	15
	4	1113	454	659	1.01835	41.2727	11	82.375	8
	5	821	154	667	1.1567	11.8462	13	166.75	4
	6	984	404	580	1.1956	19.2381	21	34.0588	17
	7	827	261	566	0.952614	10.875	24	35.375	16
	8	904	220	684	1.02239	12.2222	18	114	6
	9	664	137	527	1.21005	13.7	10	40.5385	13
	10	710	211	499	1.15616	12.4118	17	31.1875	16
	11	770	176	594	1.20746	11	16	59.4	10
	12	858	226	632	0.762478	6.84848	33	57.4545	11
	13	1031	400	631	1.53301	50	8	45.0714	14
	14	912	286	626	1.1572	19.0667	15	78.25	8
	15	916	305	611	1.04962	30.5	10	55.5455	11

## Sheet: 1C&1D rye over iso
			Sleep Analysis of rye/+
raw data										average value for single animal
Day#	animal#	total sleep(m)	daytime	nighttime	activity index	daytime episode length	daytime episode number	nighttime episode length	nighttime episode number	animal#	total	daytime	nighttime	d episode L	d episode n	n episode l	n episode n
1	1	819	250	569	1.64516	35.7143	7	51.7273	11	1	628.4	134.8	493.6	12.0863	16.2	32.6988	17
	2	323	155	168	1.11201	3.97436	39	8	21	2	424.8	220.2	204.6	5.55902	39.6	7.50561	27.4
	3	759	184	575	2.20294	8	23	41.0714	14	3	879.8	247.8	632	12.989	19.6	70.1143	10
	4	583	186	397	2.45444	11.625	16	24.8125	16	4	554.2	169	385.2	10.33	16.8	22.1003	18.2
	5	685	347	338	1.72414	13.3462	26	13.52	25	5	457.8	190	267.8	7.56526	24.8	14.4807	18.4
	6	913	316	597	1.78517	18.5882	17	54.2727	11	6	910.8	347.2	563.6	18.8134	18.6	45.3126	13.8
	7	737	139	598	2.19231	15.4444	9	59.8	10	7	588.2	143	445.2	11.7366	13.2	31.2613	15.6
	8	950	364	586	1.53579	20.2222	18	53.2727	11	8	980.4	408	572.4	32.0472	13.2	47.9404	12
	9	605	153	452	3.22062	10.9286	14	37.6667	12	9	552.4	160.4	392	10.371	15.2	21.3139	20.4
	10	707	175	532	1.22131	10.2941	17	40.9231	13	10	543.8	107.4	436.4	9.14361	12	25.6369	18
	11	617	223	394	1.23723	6.19444	36	30.3077	13	11	750	333.4	416.6	9.76092	34.8	21.6485	20.6
	12	304	143	161	1.44268	5.72	25	11.4286	14	12	512	289	223	14.2801	21.6	9.208	25.2
	13	505	176	329	0.905782	5.17647	34	18.2778	18	13	557.8	205.2	352.6	6.35439	33	15.8334	22.8
	14	647	162	485	1.66288	7.71429	21	24.25	20	14	663.6	258	405.6	14.374	19.2	15.9077	26.6
	15	590	131	459	2.34747	6.2381	21	24.1579	19	15	697	237.8	459.2	12.1387	19.8	23.009	20.6
	16	740	289	451	2.26466	22.2308	13	50.1111	9	16	707.8	310.6	397.2	20.365	15.4	34.1825	14.6
2	1	813	210	603	2.04944	14	15	46.3846	13
	2	378	174	204	0.878531	5.11765	34	8.16	25
	3	837	216	621	1.7131	12	18	51.75	12
	4	481	150	331	2.1074	9.375	16	13.7917	24
	5	546	165	381	1.43848	5.5	30	16.5652	23
	6	917	314	603	1.8566	20.9333	15	46.3846	13
	7	594	126	468	1.87589	9	14	29.25	16
	8	1063	449	614	1.52128	34.5385	13	47.2308	13
	9	501	98	403	2.24281	7.53846	13	20.15	20
	10	513	89	424	1.59223	6.84615	13	21.2	20
	11	650	325	325	1.28987	12.037	27	14.1304	23
	12	458	293	165	1.37271	15.4211	19	7.5	22
	13	620	210	410	0.740244	6.5625	32	20.5	20
	14	567	170	397	1.47079	8.94737	19	16.5417	24
	15	723	253	470	1.85914	12.65	20	27.6471	17
	16	804	291	513	1.89623	17.1176	17	57	9
3	1	579	82	497	1.37515	3.90476	21	24.85	20
	2	465	236	229	0.913758	5.24444	45	7.15625	32
	3	870	195	675	1.65088	9.28571	21	112.5	6
	4	526	175	351	1.99015	10.9375	16	18.4737	19
	5	419	201	218	1.18511	7.44444	27	12.8235	17
	6	906	317	589	1.61538	15.0952	21	65.4444	9
	7	540	31	509	1.34667	2.21429	14	28.2778	18
	8	932	391	541	1.31558	35.5455	11	41.6154	13
	9	524	148	376	2.10153	10.5714	14	13.9259	27
	10	458	102	356	1.37067	6.8	15	19.7778	18
	11	738	343	395	1.13533	9.8	35	14.1071	28
	12	639	323	316	1.37328	17	19	12.64	25
	13	576	190	386	0.686343	5	38	15.44	25
	14	646	224	422	1.32746	9.33333	24	15.0714	28
	15	813	303	510	1.66826	15.15	20	28.3333	18
	16	781	321	460	1.53263	22.9286	14	35.3846	13
4	1	469	47	422	1.13903	2.76471	17	24.8235	17
	2	455	278	177	0.93198	7.31579	38	6.55556	27
	3	939	285	654	1.50499	16.7647	17	81.75	8
	4	481	93	388	1.83212	4.65	20	22.8235	17
	5	247	105	142	1.25733	5.25	20	10.9231	13
	6	924	397	527	1.5068	19.85	20	37.6429	14
	7	454	118	336	1.46755	6.94118	17	22.4	15
	8	952	402	550	1.24846	36.5455	11	50	11
	9	566	160	406	1.81693	10.6667	15	21.3684	19
	10	416	50	366	1.1709	8.33333	6	16.6364	22
	11	841	366	475	1.07012	8.71429	42	23.75	20
	12	696	424	272	1.10484	23.5556	18	7.77143	35
	13	513	220	293	0.622438	8.46154	26	12.2083	24
	14	699	374	325	1.20513	23.375	16	11.2069	29
	15	656	280	376	1.37628	15.5556	18	15.6667	24
	16	687	327	360	1.34263	19.2353	17	20	18
5	1	462	85	377	1.10225	4.04762	21	15.7083	24
	2	503	258	245	0.722519	6.14286	42	7.65625	32
	3	994	359	635	1.20852	18.8947	19	63.5	10
	4	700	241	459	1.74189	15.0625	16	30.6	15
	5	392	132	260	1.30344	6.28571	21	18.5714	14
	6	894	392	502	1.25505	19.6	20	22.8182	22
	7	616	301	315	1.36165	25.0833	12	16.5789	19
	8	1005	434	571	1.17051	33.3846	13	47.5833	12
	9	566	243	323	1.53432	12.15	20	13.4583	24
	10	625	121	504	1.07853	13.4444	9	29.6471	17
	11	904	410	494	1.02052	12.0588	34	25.9474	19
	12	463	262	201	1.1433	9.7037	27	6.7	30
	13	575	230	345	0.532948	6.57143	35	12.7407	27
	14	759	360	399	1.17327	22.5	16	12.4688	32
	15	703	222	481	1.22659	11.1	20	19.24	25
	16	527	325	202	1.09419	20.3125	16	8.41667	24

## Sheet: 1C&1D rye
			Sleep Analysis of rye
raw data											average value for single animal
Day#	animal#	total sleep(m)	daytime	nighttime	activity index	daytime episode length	daytime episode number	nighttime episode length	nighttime episode number	animal#	total	daytime	nighttime	d episode L	d episode n	n episode l	n episode n
1	17	194	101	93	1.51566	5.05	20	5.8125	16	1	242.2	90.6	151.6	4.21833	21.4	6.58283	23.8
	18	807	393	414	0.819334	10.9167	36	13.3548	31	2	596.2	213	383.2	5.73069	36.6	12.4135	33.2
	19	135	9	126	1.66411	1.8	5	6.3	20	3	92.6	27	65.6	1.96548	11.4	3.47905	16.2
	20	323	20	303	0.94086	2.22222	9	27.5455	11	4	638.2	271.6	366.6	15.0368	16	18.5594	22.2
	21	210	36	174	1.35801	2.25	16	5.4375	32	5	184.2	47	137.2	2.56068	18	4.33186	32.2
	22	174	59	115	1.25217	2.56522	23	4.42308	26	6	236	113.6	122.4	4.64093	24.4	3.77607	32.4
	23	639	244	395	0.75	5.95122	41	13.1667	30	7	794.8	324.4	470.4	7.78476	42	15.4532	32.2
	24	206	12	194	1.61071	1.71429	7	8.08333	24	8	158.4	23.6	134.8	2.96782	8	6.34707	21.4
	25	162	54	108	1.38528	2.7	20	3.48387	31	9	293.4	109.6	183.8	3.84236	27	4.97679	35.8
	26	568	377	191	1.22273	13.4643	28	5.96875	32	10	671.8	342.4	329.4	10.24	34.2	10.5015	31
	27	989	527	462	0.755556	21.08	25	15.4	30	11	910.2	478.2	432	16.4587	32	13.5581	35.8
	28	150	13	137	2.02793	1.85714	7	8.5625	16	12	82.8	15.2	67.6	2.42643	6.2	5.14901	12
	29	234	153	81	2.7361	9.5625	16	5.4	15	13	202.2	87.2	115	4.97745	17.4	5.86974	19.6
	30	78	33	45	1.38134	2.35714	14	3.75	12	14	192	50.8	141.2	2.62733	17.8	5.85733	21.4
	31	374	49	325	2.35681	3.76923	13	13.5417	24	15	269.8	33.8	236	2.65147	12	9.84674	24
	32	27	14	13	1.51771	2	7	1.85714	7	16	26.4	13	13.4	1.71667	7.4	1.79048	7.4
2	17	152	34	118	1.45652	3.77778	9	8.42857	14
	18	411	93	318	1.02721	3.32143	28	9.35294	34
	19	38	4	34	1.8923	1	4	2.83333	12
	20	468	107	361	1.00412	8.23077	13	22.5625	16
	21	187	64	123	0.986433	3.36842	19	4.24138	29
	22	205	74	131	1.27692	3.89474	19	3.54054	37
	23	584	191	393	0.746495	4.775	40	8.73333	45
	24	179	29	150	1.34496	3.22222	9	6.81818	22
	25	156	62	94	1.25	3.26316	19	3.76	25
	26	541	335	206	0.964405	10.4688	32	7.92308	26
	27	580	362	218	0.746512	9.52632	38	4.54167	48
	28	131	8	123	2.15126	1.6	5	8.78571	14
	29	260	137	123	2.22712	7.61111	18	6.47368	19
	30	159	15	144	1.21702	2.14286	7	5.33333	27
	31	198	16	182	1.80918	2.28571	7	7.58333	24
	32	17	4	13	1.5123	1	4	1.85714	7
3	17	309	103	206	1.44562	3.81481	27	7.92308	26
	18	599	133	466	1.00832	3.69444	36	20.2609	23
	19	34	17	17	1.88905	1.7	10	2.42857	7
	20	605	313	292	0.844311	15.65	20	11.2308	26
	21	138	50	88	0.963134	3.125	16	2.93333	30
	22	259	140	119	1.5839	5.18519	27	3.21622	37
	23	786	314	472	0.668196	6.68085	47	15.2258	31
	24	186	28	158	1.14514	2.54545	11	7.9	20
	25	306	88	218	1.21958	3.03448	29	5.45	40
	26	620	301	319	0.797561	8.85294	34	11	29
	27	837	424	413	0.69103	9.86047	43	9.80952	42
	28	27	3	24	2.18825	3	1	3.42857	7
	29	205	80	125	2.20324	3.63636	22	6.25	20
	30	87	29	58	1.54176	1.70588	17	3.41176	17
	31	223	10	213	1.3484	1.25	8	10.1429	21
	32	17	6	11	1.22277	2	3	1.57143	7
4	17	250	105	145	1.08151	4.375	24	5.17857	28
	18	589	200	389	1.12808	5	40	11.7879	33
	19	48	32	16	1.31825	2.28571	14	1.33333	12
	20	848	439	409	0.766497	20.9048	21	12	34
	21	196	64	132	0.868971	2.56	25	3.21951	41
	22	231	152	79	1.29115	4.75	32	3.16	25
	23	998	467	531	0.524887	12.2895	38	17.7	30
	24	137	34	103	1.07905	4.85714	7	6.05882	17
	25	416	147	269	1.13184	4.74194	31	7.07895	38
	26	765	296	469	0.742222	7.21951	41	15.129	31
	27	992	505	487	0.762864	15.7812	32	13.9143	35
	28	47	19	28	2.08327	2.375	8	3.11111	9
	29	164	47	117	1.8895	2.35	20	5.85	20
	30	188	97	91	1.54233	3.73077	26	4.13636	22
	31	308	46	262	1.36307	3.28571	14	9.35714	28
	32	39	19	20	1.23626	1.58333	12	2	10
5	17	306	110	196	1.23104	4.07407	27	5.57143	35
	18	575	246	329	0.89711	5.72093	43	7.31111	45
	19	208	73	135	0.972403	3.04167	24	4.5	30
	20	947	479	468	0.763747	28.1765	17	19.4583	24
	21	190	21	169	1.008	1.5	14	5.82759	29
	22	311	143	168	1.21966	6.80952	21	4.54054	37
	23	967	406	561	0.64482	9.22727	44	22.44	25
	24	84	15	69	1.16298	2.5	6	2.875	24
	25	427	197	230	0.973346	5.47222	36	5.11111	45
	26	865	403	462	0.674783	11.1944	36	12.4865	37
	27	1153	573	580	0.692308	26.0455	22	24.125	24
	28	59	33	26	2.02172	3.3	10	1.85714	14
	29	148	19	129	1.53715	1.72727	11	5.375	24
	30	448	80	368	1.18063	3.2	25	12.6552	29
	31	246	48	198	1.40536	2.66667	18	8.6087	23
	32	32	22	10	1.29545	2	11	1.66667	6
