# Supplementary material for: Identification of Redeye, a new sleep-regulating protein whose expression is modulated by sleep amount
Source: eLife. 2014 Feb 4;3:e01473. doi: 10.7554/eLife.01473 (PMC3912633; doi:10.7554/eLife.01473)
Supplement: Figure 3—Source data 1. — DOI: http://dx.doi.org/10.7554/eLife.01473.008 [file elife01473s002.xlsx]

## Sheet: Figure3A
					recombination mapping of the rye mutation using a chromsome marked with the visible markers h,th,cu,sr,e
					Figure3A_source_data
						note: The mapping region of rye mutation is shaded based on phenotype of each recombinant.
					chr.3 position	3L_8.67Mb	3L_16.04Mb	3R_7.03Mb	3R_13.92Mb	3R_17.06Mb
			visible markers	behavior phenotype (rye)	Recombinants	hairy	thread	curled	stripe	ebony
			cu, sr, e	+	E1
			th,cu,sr,e	+	E2
			h	rye	E3
			sr,e	rye	E7
			sr,e	rye	K1
			h,th	rye	K2
			h,th,cu	+	K3
			h,th	rye	K4
			h	rye	K5
			th,cu	+	K6
			cu, sr, e	+	K7
			th,cu, sr, e	+	K8
			h,th	rye	K9
			cu, sr, e	rye	K10
			sr,e	rye	K11
			h	rye	K12
			h,th,cu	+	K14
			th,cu,sr,e	+	K15
			h	rye	K16
			cu, sr, e	+	K17
			sr	rye	K18
			sr,e	rye	K19
			sr,e	rye	K20
			sr,e	rye	K21
			h,th,cu	+	K22
			h,th,cu	rye	K23
			cu, sr, e	+	K24
			sr,e	rye	K25
			cu, sr, e	+	K27
			cu, sr, e	rye	K28
			sr,e	rye	K29
			h,th,cu	+	K30
			h,th,cu	+	K31
			sr,e	rye	K32
			cu, sr, e	rye	K33
			sr,e	rye	K34
			sr	rye	K36
			h	rye	K37
			h,th	rye	K38
			th	+	K39
			th,cu,sr,e	+	K41
			sr,e	rye	K43
			h,th,cu	+	K44
			h,sr	rye	K45
			h,th	rye	K46
			h,cu,sr,e	+	K47
			sr,e	rye	K48
			sr,e	rye	K49
			sr,e	rye	K50
			h,cu,sr,e	+	K51
			cu, sr, e	+	K52
			e	rye	K53
			h	rye	K54
			h	rye	K55
			h,th,cu	+	K56
			h,th,cu,sr	+	K57
			sr,e	rye	K58
			h	rye	K59
			th,cu,sr,e	+	K60
			h,th,cu,sr	+	K61
			sr,e	rye	K62
			cu, sr, e	rye	K63
			h,th	rye	K64
			h,th,cu	+	K65
			h,sr,e	rye	K66
			h,th,cu	+	K67

## Sheet: Figure 3A
							recombination mapping of the rye mutation using SNP markers: Figure3A_source_data
		confirm 4-27-11		V: visible marker
				M: rye mutant (from iso background)
				note: The mapping region of rye mutation is shaded based on phenotype of each recombinant.
							SNP_L					SNP_R
		phenotype	recombinants	thread(3L_16M)	SNP3L_16M	SNP3L_17M	SNP3L_18M	SNP3L_21M	SNP3L_23M	SNP3R_1M	SNP3R_3M	SNP3R_5M	curled(3R_7M)	SNP3R_18M	phenotype
		WT	K27	M	M	V	V					V	V		+
		#1598	K28	M			M	M	M	M	M	V	V	V	rye
		WT	K39	V			V					V	M	M	+
		#1598	K46	V			V	M	M	M	M	M	M	M	rye
		WT	K47	M	M	V	V					V	V		+
		WT	K52	M			M	V	V	V	V	V	V		+
