# Supplementary material for: Identification of Redeye, a new sleep-regulating protein whose expression is modulated by sleep amount
Source: eLife. 2014 Feb 4;3:e01473. doi: 10.7554/eLife.01473 (PMC3912633; doi:10.7554/eLife.01473)
Supplement: Figure 4—Source data 1. — DOI: http://dx.doi.org/10.7554/eLife.01473.010 [file elife01473s003.xlsx]

## Sheet: Figure4B
				Sleep behavior of transgenically rescued rye mutants: Figure4B_source_data.xlsx
				total sleep duration (m)
		Genotype	animal #	Day 1	day 2	day 3	day 4	day 5	AVG
		uas-rye,rye	1	255	258	166	116	39	166.8
			2	307	266	181	83	59	179.2
			3	304	235	228	104	148	203.8
			4	106	176	168	179	480	221.8
			5	124	418	544	305	161	310.4
			6	247	261	267	359	506	328
			7	482	264	370	241	324	336.2
			8	168	253	343	467	554	357
			9	262	548	284	324	529	389.4
			10	329	270	186	406	811	400.4
			11	182	409	538	559	424	422.4
			12	55	302	469	663	837	465.2
			13	353	485	477	680	641	527.2
			14	566	535	611	627	417	551.2
			15	275	541	657	682	667	564.4
			16	544	713	897	899	863	783.2
		rye-G4;rye	1	250	131	226	236	193	207.2
			2	189	242	408	372	386	319.4
			3	445	271	317	358	455	369.2
			4	312	483	405	627	539	473.2
		ryeG4;uas-rye,rye	1	624	587	606	605	620	608.4
			2	493	375	381	403	498	430
			3	763	1018	1021	1029	901	946.4
			4	683	578	668	766	664	671.8
			5	322	420	418	497	500	431.4
			6	882	752	820	829	840	824.6
			7	426	715	489	533	537	540
			8	495	634	647	543	599	583.6
			9	458	624	631	753	791	651.4
			10	638	566	505	544	634	577.4
			11	604	701	700	828	776	721.8
			12	724	593	842	1095	1017	854.2
			13	757	622	884	789	799	770.2
			14	580	519	481	348	249	435.4
			15	457	330	372	538	483	436
			16	464	522	470	289	439	436.8
			17	499	690	624	618	445	575.2
			18	410	179	462	684	635	474
			19	423	480	504	570	659	527.2
			20	633	714	609	574	615	629
			21	455	586	487	692	705	585
			22	453	530	696	637	725	608.2
			23	571	718	864	914	711	755.6
			24	812	853	726	991	903	857
			25	816	759	885	799	940	839.8
			26	1062	915	946	889	992	960.8
			27	719	799	1076	1012	1037	928.6
			28	1125	1120	1016	1044	1010	1063
			29	1166	1115	1125	1174	905	1097
			30	1291	1170	1145	1168	1124	1179.6
		iso	1	446	537	429	377	583	474.4
			2	530	610	526	589	712	593.4
			3	644	833	686	727	650	708
			4	539	779	703	738	748	701.4
			5	738	846	665	734	764	749.4
			6	559	693	779	843	844	743.6
			7	931	865	699	758	695	789.6
			8	597	688	837	853	785	752
			9	713	797	773	806	783	774.4
			10	665	733	867	835	837	787.4
			11	842	829	779	766	754	794
			12	832	822	842	868	731	819
			13	760	863	919	777	734	810.6
			14	812	902	706	749	905	814.8
			15	793	757	829	897	849	825
			16	765	882	878	1000	874	879.8
			17	734	911	984	1031	861	904.2
			18	782	903	862	957	998	900.4
			19	811	916	841	806	1025	879.8
			20	803	918	886	952	885	888.8
			21	721	849	904	1016	915	881
			22	797	911	1016	996	1004	944.8
			23	729	958	929	986	997	919.8
			24	876	825	1009	1029	893	926.4
			25	769	1003	1073	1085	1038	993.6
			26	995	1044	981	1059	951	1006
			27	1063	1096	974	964	925	1004.4
			28	889	988	1022	1057	915	974.2
			29	809	994	1006	1115	1036	992
			30	873	934	1093	982	1079	992.2
			31	927	995	1023	1061	949	991
			32	1146	1214	1219	1121	1125	1165

## Sheet: Figure4C
				Sleep behavior of rye RNAi lines: Figure4C_source_data.xlsx
					total sleep duration (m)
		Genotype	animal #	Day 1	day 2	day 3	day 4	day 5	AVG
		rye RNAi	1	738	627	741	677	689	694.4
			2	631	604	694	795	778	700.4
			3	778	771	702	737	800	757.6
			4	675	737	825	799	873	781.8
			5	762	834	820	849	805	814
			6	800	870	733	720	1123	849.2
			7	907	957	996	1014	1092	993.2
			8	1147	1266	1237	1259	1254	1232.6
		ryeG4;Dicer/+	1	529	512	579	678	477	555
			2	699	774	756	942	1043	842.8
			3	916	828	871	930	951	899.2
			4	890	1120	1119	1134	988	1050.2
			5	1101	1157	1073	1145	1138	1122.8
			6	878	897	1248	1353	1248	1124.8
			7	960	1172	1270	1266	1214	1176.4
			8	1096	1218	1257	1280	1280	1226.2
		ryeG4/ryeRNAi	1	829	841	812	748	696	785.2
			2	857	735	787	784	845	801.6
			3	895	858	849	1001	1116	943.8
			4	1009	954	1045	946	911	973
			5	872	842	863	1206	1157	988
			6	862	1059	1071	1118	1168	1055.6
			7	951	1120	1132	1094	1007	1060.8
		ryeG4/ryeRNAi;Dicer/+	1	284	399	408	375	568	406.8
			2	580	468	554	506	445	510.6
			3	582	553	453	557	543	537.6
			4	542	603	595	590	671	600.2
			5	551	665	655	707	758	667.2
			6	605	577	711	757	708	671.6
			7	729	781	720	724	693	729.4
			8	745	723	746	711	844	753.8
