# Supplementary material for: Identification of Redeye, a new sleep-regulating protein whose expression is modulated by sleep amount
Source: eLife. 2014 Feb 4;3:e01473. doi: 10.7554/eLife.01473 (PMC3912633; doi:10.7554/eLife.01473)
Supplement: Figure 5—Source data 1. — DOI: http://dx.doi.org/10.7554/eLife.01473.012 [file elife01473s004.xlsx]

## Sheet: Figure5B
			Sleep analysis of rye mutants overexpressing sss: Figure5B_source_data.xlsx
				total sleep duration (m)
	Genotype	animal #	Day 1	day 2	day 3	day 4	day 5	day 6	AVG
	rye/+	1	213	152	152	253	436	697	317.167
		2	437	433	251	654	435	502	452
		3	504	383	420	482	486	686	493.5
		4	680	627	496	932	1056	910	783.5
		5	772	629	671	763	1005	974	802.333
		6	736	768	788	834	897	850	812.167
		7	1011	922	896	865	911	890	915.833
		8	722	906	1023	993	931	972	924.5
		9	101	114	180	277			168
		10	246	179	214	191			207.5
		11	187	192	280	327			246.5
		12	315	365	295	513			372
		13	142	459	489	549			409.75
		14	300	318	610	552			445
		15	505	351	332	637			456.25
		16	387	546	530	511			493.5
		17	539	418	697	776			607.5
		18	341	773	682	660			614
		19	695	663	632	509			624.75
		20	596	584	700	658			634.5
		21	476	672	608	804			640
		22	360	760	765	725			652.5
		23	682	594	550	842			667
		24	559	567	702	868			674
		25	766	724	708	600			699.5
		26	860	771	563	655			712.25
		27	633	783	797	765			744.5
		28	539	750	886	813			747
		29	648	765	790	881			771
		30	692	843	760	795			772.5
		31	647	829	803	860			784.75
		32	762	807	829	782			795
		33	1037	833	600	747			804.25
		34	718	898	866	800			820.5
		35	816	758	831	882			821.75
		36	950	741	739	888			829.5
		37	787	836	923	872			854.5
		38	845	947	938	955			921.25
		39	901	989	986	1006			970.5
	sssTG1/+	1	790	601	591	747	783	816	721.333
		2	595	654	646	672	644	893	684
		3	868	676	828	605	766	663	734.333
		4	620	733	740	716	688	698	699.167
		5	799	751	751	892	823	710	787.667
		6	748	755	858	703	858	847	794.833
		7	802	815	683	708	835	764	767.833
		8	925	853	843	860	777	924	863.667
		9	497	626	698	592			603.25
		10	618	735	701	702			689
		11	755	755	771	618			724.75
		12	888	775	824	627			778.5
		13	674	806	753	782			753.75
		14	732	823	753	933			810.25
		15	973	870	669	695			801.75
		16	848	902	810	625			796.25
		17	878	911	852	770			852.75
		18	957	926	973	898			938.5
		19	843	971	846	834			873.5
		20	1100	1021	1016	1038			1043.75
		21	979	1036	915	907			959.25
		22	905	1059	960	819			935.75
		23	909	1060	1009	859			959.25
		24	1031	1064	1179	1134			1102
	sssTG1/rye	1	902	614	651	682	777	948	762.333
		2	486	405	304	326	382	476	396.5
		3	192	285	253	284	272	405	281.833
		4	586	723	629	520	538	504	583.333
		5	321	215	171	250	298	407	277
		6	562	601	563	547	475	438	531
		7	148	303	359	327	507	544	364.667
		8	288	191	195	266	465	457	310.333
		9	387	204	209	309	295	406	301.667
		10	244	93	165	259	271	240	212
		11	362	312	320	543	462	616	435.833
		12	455	345	455	520	508	442	454.167
		13	717	571	562	827	835	664	696
		14	210	316	339	455	513	669	417
		15	610	614	570	332	367	354	474.5
		16	492	478	414	462	369	654	478.167
		17	47	51	102	188	164	347	149.833
		18	566	454	433	577	633	566	538.167
		19	489	339	380	398	257	427	381.667
		20	553	382	453	425	446	477	456
		21	569	438	399	539	528	580	508.833
		22	184	222	336	418	365	441	327.667
		23	71	117	107	463			189.5
		24	168	142	162	288			190
		25	372	357	417	437			395.75
		26	548	524	178	334			396
		27	181	481	456	615			433.25
		28	397	511	513	533			488.5
		29	699	655	517	475			586.5
		30	487	489	689	744			602.25
		31	667	704	569	556			624
		32	629	715	554	666			641
		33	604	689	672	620			646.25
		34	559	717	696	705			669.25
		35	555	728	685	750			679.5
		36	624	678	774	672			687
		37	599	813	778	669			714.75
		38	573	726	791	842			733
		39	664	792	681	803			735
		40	645	735	758	872			752.5
		41	629	752	826	879			771.5
		42	710	762	797	867			784
		43	794	864	899	874			857.75
		44	767	825	987	950			882.25
	sssTG2/+	1	403	380	451	428	816	853	555.167
		2	410	430	413	553	549	608	493.833
		3	506	437	437	470	415	542	467.833
		4	627	625	534	588	556	700	605
		5	655	626	470	435	551	636	562.167
		6	700	633	511	735	739	588	651
		7	687	666	655	671	679	777	689.167
		8	867	691	811	785	773	946	812.167
		9	743	673	667	684			691.75
		10	614	728	776	945			765.75
		11	618	750	760	778			726.5
		12	547	771	798	671			696.75
		13	721	817	855	835			807
		14	773	863	907	1025			892
		15	1011	871	915	896			923.25
		16	642	873	804	748			766.75
		17	1012	876	928	1058			968.5
		18	732	884	867	851			833.5
		19	979	908	1025	1051			990.75
		20	742	917	838	877			843.5
		21	785	940	898	915			884.5
		22	860	973	945	974			938
		23	820	1008	920	895			910.75
		24	1004	1052	1060	1109			1056.25
	sssTG2/rye	1	339	143	78	134	106	247	174.5
		2	178	212	179	148	244	269	205
		3	336	355	306	70	99	135	216.833
		4	79	176	145	365	492	386	273.833
		5	320	290	325	459	283	284	326.833
		6	390	383	356	331	242	399	350.167
		7	504	312	233	377	370	426	370.333
		8	505	644	414	378	438	312	448.5
		9	474	424	384	462	543	493	463.333
		10	440	454	493	416	456	549	468
		11	389	542	481	557	503	480	492
		12	503	485	421	487	507	583	497.667
		13	649	760	421	445	314	478	511.167
		14	581	531	538	472	499	548	528.167
		15	612	428	332	602	734	706	569
		16	735	579	489	569	665	768	634.167
		17	788	754	682	662	470	570	654.333
		18	587	656	626	649	731	758	667.833
		19	773	739	534	622	641	703	668.667
		20	834	822	820	762	639	577	742.333
		21	240	270	319	359			297
		22	127	308	353	410			299.5
		23	390	411	318	320			359.75
		24	554	537	528	297			479
		25	494	592	526	488			525
		26	519	510	565	598			548
		27	459	509	575	658			550.25
		28	527	611	531	635			576
		29	491	534	572	750			586.75
		30	534	631	577	615			589.25
		31	634	716	544	714			652
		32	595	561	741	738			658.75
		33	693	749	685	608			683.75
		34	799	631	603	741			693.5
		35	721	712	653	729			703.75
		36	649	725	834	807			753.75
	sssTG3/+	1	588	505	548	680	649		594
		2	312	651	650	771	626		602
		3	645	677	668	645	633		653.6
		4	810	685	698	568	496		651.4
		5	715	778	1014	969			869
		6	762	785	863	941			837.75
		7	698	812	733	758			750.25
		8	709	823	984	984			875
		9	927	913	1003	1037			970
		10	784	916	952	834			871.5
		11	936	1006	1061	993			999
		12	1008	1037	1095	1090			1057.5
	sssTG3;;rye/+	1	283	67	16	20	43		85.8
		2	69	114	260	680	627		350
		3	206	173	414	720	704		443.4
		4	264	183	375	557	635		402.8
		5	510	300	378	387	262		367.4
		6	754	654	655	719	583		673
		7	478	453	893	833	486		628.6
		8	269	326	220	290	208		262.6
		9	452	171	292	464	572		390.2
		10	432	490	540	509	646		523.4
		11	242	98	81	99	159		135.8
		12	282	143	186	192	134		187.4
		13	423	337	236	332	419		349.4
		14	415	452	357	522	522		453.6
		15	349	467	519	513	410		451.6
		16	103	337	228	463			282.75
		17	469	535	666	664			583.5
		18	653	684	623	515			618.75
		19	559	625	739	779			675.5
		20	708	733	623	722			696.5
		21	632	627	752	813			706
		22	619	848	757	716			735
		23	694	822	694	761			742.75
		24	750	751	820	699			755
		25	754	747	811	851			790.75
		26	714	1031	874	946			891.25

## Sheet: Figure5C&5D
			Whole-cell membrane current recording of Xenopus oocytes: Figure5C_5D_source_data.xlsx
				whole-cell membrane current recording (uA)
				RYE+b2	RYE+b2+SSS	Human a4b2	Human a4b2+SSS
				-0.03413	0.00444	-6.9558	-0.5726
				-0.09992	0.00402	-5.4644	-1.9138
				-0.02717	0.01342	-7.9708	-1.7514
				-0.02438	0.0137	-6.735	-0.595
				-8e-05	0.00222	-11.612	-0.0943
						-0.0928	-0.4221
						-3.3908	-1.0847
						-6.3536	-0.8633
						-6.3642	-2.326
						-2.6984	-1.8717
			average	-0.037136	0.00756	-5.76378	-1.14949
