# Supplementary material for: Identification of Redeye, a new sleep-regulating protein whose expression is modulated by sleep amount
Source: eLife. 2014 Feb 4;3:e01473. doi: 10.7554/eLife.01473 (PMC3912633; doi:10.7554/eLife.01473)
Supplement: Figure 6—Source data 1. — DOI: http://dx.doi.org/10.7554/eLife.01473.014 [file elife01473s005.xlsx]

## Sheet: 6A-per qPCR 
			qPCR analysis of per and rye expression during an LD cycle: Figure6A_source_data.xlsx
qPCR of per
raw data
Sample Name	Detector	Mean Quantity	Std. Dev. Quantity
zt2m	Actin	392.9	22.874					actin	per	SD
zt6m	Actin	517.61	16.336				zt2m	392.9	71.87	14.476
zt10m	Actin	442.67	28.158				zt6m	517.61	445.77	6.376
zt14m	Actin	446.77	53.266				zt10m	442.67	675.89	87.865
zt18m	Actin	384.05	52.467				zt14m	446.77	855.96	118.235
zt22m	Actin	384.42	14.032				zt18m	384.05	228.43	31.985
zt2f	Actin	390.27	25.41				zt22m	384.42	81.01	13.094
zt6f	Actin	372.57	22.535				zt2f	390.27	87.09	8.621
zt10f	Actin	233.7	168.313				zt6f	372.57	264.04	50.15
zt14f	Actin	342.15	0.994				zt10f	233.7	350.35	42.482
zt18f	Actin	426.09	30.421				zt14f	342.15	522.59	31.799
zt22f	Actin	374.5	24.646				zt18f	426.09	241.19	29.461
zt2m	per	71.87	14.476				zt22f	374.5	63.16	13.365
zt6m	per	445.77	6.376				ZT	male	SD	female	SD
zt10m	per	675.89	87.865			normalized	2	0.182922	0.036844	0.223153	0.0220898
zt14m	per	855.96	118.235				6	0.861208	0.0123182	0.708699	0.134606
zt18m	per	228.43	31.985				10	1.52685	0.198489	1.49914	0.18178
zt22m	per	81.01	13.094				14	1.91589	0.264644	1.52737	0.0929388
zt2f	per	87.09	8.621				18	0.594792	0.0832834	0.566054	0.0691427
zt6f	per	264.04	50.15				22	0.210733	0.0340617	0.168652	0.0356876
zt10f	per	350.35	42.482
zt14f	per	522.59	31.799
zt18f	per	241.19	29.461
zt22f	per	63.16	13.365

## Sheet: 6A-rye qPCR
		qPCR analysis of per and rye expression during an LD cycle: Figure6A_source_data.xlsx
		qPCR of rye
		ZT	actin	SD	155-149	SD
		zt2m	386.26	34.707	371.24	30.817
		zt6m	495.91	8.584	493.23	47.736
		zt10m	397.82	31.05	392.86	42.719
		zt14m	414.87	2.811	428.64	29.716
		zt18m	388.63	9.208	391.09	27.666
		zt22m	390.08	8.147	450.91	6.408
		zt2f	372.69	8.97	360.68	25.519
		zt6f	395.03	12.912	295.19	21.25
		zt10f	332.74	3.301	258.87	15.519
		zt14f	325.25	35.504	277.11	17.811
		zt18f	387.92	24.128	470.22	44.351
		zt22f	354.43	11.311	321.66	22.427
		rye/actin
		ZT	male	SD	female	SD
		2	0.961114	0.079783	0.967775	0.0684725
		6	0.994596	0.0962594	0.74726	0.0537934
		10	0.987532	0.107383	0.777995	0.04664
		14	1.03319	0.0716273	0.851991	0.054761
		18	1.00633	0.0711885	1.21216	0.11433
		22	1.15594	0.0164274	0.907542	0.0632762

## Sheet: Figure6B
					Densitometry quantification of RYE expression: Figure6B_source_data.xlsx
			female	raw RYE	MAPK	RYE	relative	male	MAPK	RYE	relative
			2	4510.47	45419	0.099308	1	887.192	42614.4	0.020819	1.00092
			6	30742.8	37044.5	0.829887	8.3567	40293.8	40319.8	0.999355	48.0459
			10	683.154	46780.2	0.0146035	0.147052	44265.1	30622.6	1.4455	69.4954
			14	2064.22	42176.9	0.0489421	0.492831	808.69	30998.2	0.0260883	1.25424
			18	38785.3	55529.6	0.698462	7.03329	25622.2	53707.8	0.477067	22.9359
			22	3878.37	47077.6	0.0823824	0.829565	20977.7	39214.8	0.534942	25.7184
			2	35324.8	12817.4	2.75601	1
			6	37090	16321.9	2.27241	0.824532
			10	2360.81	12804.6	0.184372	0.0668982
			14	42753.2	12675.8	3.37282	1.22381
			18	6869.57	11959.7	0.574396	0.208416
			22	7889.33	11754.2	0.671194	0.243539
				male
			ZT	raw RYE	MAPK	RYE	relative	raw RYE	MAPK	RYE	relative
			2	5156.66	59027.9	0.0873598	0.999997	10627.4	29160.9	0.364439	0.999999
			6	36429.8	75552.9	0.482175	5.51941	30110	18187.9	1.65549	4.54258
			10	12882	58238.1	0.221196	2.532	56335.6	23776.1	2.36942	6.50155
			14	2135.15	51730.2	0.0412748	0.472468	2375.39	20355.3	0.116696	0.320208
			18	93454.7	71699.1	1.30343	14.9202	66235	19156.3	3.4576	9.48746
			22	43410.1	62181.9	0.698115	7.99125	45628.8	22297	2.04641	5.61522
				female				male				male
			ZT	raw RYE	MAPK	RYE	relative	raw RYE	MAPK	RYE	relative	raw RYE	MAPK	RYE	relative
			2	3664.34	58016.8	0.0631599	0.999999	4040.92	57970.8	0.0697062	1	3399.51	52698	0.0645093	1.00001
			6	69695.1	44163.9	1.5781	24.9857	57536.1	63982.5	0.899248	12.9006	42027.5	52487.5	0.800714	12.4124
			10	8963.55	45844.9	0.195519	3.09562	25101.8	54630	0.459487	6.59178	70651.8	40374	1.74993	27.1269
			14	10189.3	46796.3	0.217737	3.44739	32344.1	42786.3	0.755944	10.8448	36652.5	52611.1	0.696668	10.7996
			18	11814.7	37234.7	0.317303	5.0238	61767.3	60842.7	1.0152	14.564	63605.5	58749.6	1.08265	16.783
			22	37945.9	38263.4	0.991704	15.7015	32569.8	53634.6	0.607254	8.71164	35447.8	65725.4	0.539332	8.36058
			ZT/Experiment #	1	1 conversion	2	2 conversion	3	3 conversion	4	4 conversion	5	5 conversion	6	6 conversion	7	7 conversion	8	8 conversion
			2	1	0.335957	1.00092	0.0356513	1	1.682	0.999997	0.184983	0.999999	0.218443	0.999999	0.112667	1	0.109865	1.00001	0.0784497
			6	8.3567	2.80749	48.0459	1.71133	0.824532	1.38686	5.51941	1.021	4.54258	0.992298	24.9857	2.81508	12.9006	1.41732	12.4124	0.973748
			10	0.147052	0.0494033	69.4954	2.47534	0.0668982	0.112522	2.532	0.468379	6.50155	1.42022	3.09562	0.348776	6.59178	0.724202	27.1269	2.12809
			14	0.492831	0.16557	1.25424	0.0446746	1.22381	2.05844	0.472468	0.0873988	0.320208	0.0699475	3.44739	0.388409	10.8448	1.19145	10.7996	0.847218
			18	7.03329	2.36288	22.9359	0.816949	0.208416	0.350555	14.9202	2.75999	9.48746	2.07248	5.0238	0.56602	14.564	1.60006	16.783	1.31661
			22	0.829565	0.278698	25.7184	0.916056	0.243539	0.409631	7.99125	1.47825	5.61522	1.22661	15.7015	1.76905	8.71164	0.9571	8.36058	0.655882
			average	2.97657		28.0751		0.594532		5.40589		4.57784		8.87567		9.10212		12.7471
			ZT/Experiment #	1	2	3	4	5	6	7	8	RYE	sd	SE
			2	0.335957	0.0356513	1.682	0.184983	0.218443	0.112667	0.109865	0.0784497	0.344752	0.54841	0.193892
			6	2.80749	1.71133	1.38686	1.021	0.992298	2.81508	1.41732	0.973748	1.64064	0.766176	0.270884
			10	0.0494033	2.47534	0.112522	0.468379	1.42022	0.348776	0.724202	2.12809	0.965866	0.932776	0.329786
			14	0.16557	0.0446746	2.05844	0.0873988	0.0699475	0.388409	1.19145	0.847218	0.606639	0.719446	0.254363
			18	2.36288	0.816949	0.350555	2.75999	2.07248	0.56602	1.60006	1.31661	1.48069	0.875103	0.309396
			22	0.278698	0.916056	0.409631	1.47825	1.22661	1.76905	0.9571	0.655882	0.961409	0.51488	0.182037
			p value
			ZT2 vs ZT 6	0.00163329
			ZT14 vs ZT18	0.0466256

## Sheet: Figure6C
			RYE	A	B	C	D	E
			ZT2	0.912659	2.12881	3.20025	0.216604	2.41315
			ZT6	1.44928	0.63048	0.228705	2.55746	0.878437
			ZT10	0.262261	2.46149	0.200875	0.523585	0.179208
			ZT14	1.11873	0.617942	1.83914	0.121201	1.15604
			ZT18	1.64888	0.0525227	0.446038	1.58115	1.02937
			ZT22	0.608185	0.108753	0.0850045		0.343795
			RYE	A	D	average	SD	SEM
			2	0.912659	0.216604	0.564631	0.492186	0.348028
			6	1.44928	2.55746	2.00337	0.783606	0.554093
			10	0.262261	0.523585	0.392923	0.184784	0.130662
			14	1.11873	0.121201	0.619965	0.705358	0.498764
			18	1.64888	1.58115	1.61502	0.047897	0.0338683
			22	0.608185		0.608185
			2	0.912659	0.216604	0.564631	0.492186	0.348028
			RYE	B	C	E	average	SD	SE
			2	2.12881	3.20025	2.41315	2.58074	0.555029	0.320446
			6	0.63048	0.228705	0.878437	0.579207	0.327887	0.189306
			10	2.46149	0.200875	0.179208	0.947192	1.31147	0.757177
			14	0.617942	1.83914	1.15604	1.20437	0.61203	0.353356
			18	0.0525227	0.446038	1.02937	0.50931	0.491487	0.28376
			22	0.108753	0.0850045	0.343795	0.179184	0.143051	0.0825905
			2	2.12881	3.20025	2.41315	2.58074	0.555029	0.320446
