# Supplementary material for: Identification of Redeye, a new sleep-regulating protein whose expression is modulated by sleep amount
Source: eLife. 2014 Feb 4;3:e01473. doi: 10.7554/eLife.01473 (PMC3912633; doi:10.7554/eLife.01473)
Supplement: Figure 7—Source data 1. — DOI: http://dx.doi.org/10.7554/eLife.01473.018 [file elife01473s006.xlsx]

## Sheet: iso cf fumin
2013-04-28	iso			fumin			5/20/13'							5/20/13"
A	RYE	MAPK	ratio	RYE	MAPK	ratio	B	RYE	Actin	ratio	RYE	Actin	ratio	C	RYE	Actin	ratio	RYE	Actin	ratio
	765.255	53094.8	0.014413	673.184	40969.1	0.0164315		2746.83	44867.8	0.0612206	23118.8	50218.2	0.460367		2364.1	41641.6	0.0567727	38021.6	40884.5	0.929976
	4667.83	45986.4	0.101505	10600.3	50086.9	0.211638		50807.2	37752	1.34581	32014	41527.5	0.77091		33433.2	42730.1	0.782426	16042.6	48684.3	0.329523
	11459.2	52168.3	0.219658	55733.4	53850.6	1.03496		6405.44	39543.8	0.161983	27982.6	48365	0.578571		11623.8	33579.4	0.346157	15355.1	47339.2	0.324364
	320.234	43367	0.00738429	877.397	40270.4	0.0217877		7076.12	42098	0.168087	10835.7	38692.6	0.280046		16044.7	27977.8	0.57348	12322.8	36921.6	0.333756
	16107.6	47800.8	0.336974	42700.5	49571.4	0.861393		8514.35	38636.6	0.22037	45639.4	52296.9	0.872697		37403	47342.6	0.790048	43007.7	45112.2	0.953348
	7971.9	46306.3	0.172156	24274.9	53594.5	0.452936		27082.7	46496.5	0.582467	26542.1	49023.3	0.541418		19966.4	44733	0.446345	53186.1	28914	1.83946
average			0.142015			0.433191				0.423324			0.584001				0.499205			0.785072
	RYE	A	B	C	average	SD	SEM
	iso	0.142015	0.423324	0.499205	0.354848	0.153651	0.0887103
	fumin	0.433191	0.584001	0.785072	0.600755	0.144142	0.0832205
	p Value	0.0143893

## Sheet: iso cf sss
2013-04-28	iso			sss			11/29/2013'	iso			sss			11/29/2013'	iso			sss
A	RYE	MAPK	ratio	RYE	MAPK	ratio	B	RYE	Actin	ratio	RYE	Actin	ratio	C	RYE	Actin	ratio	RYE	Actin	ratio
	433.426	53615	0.00808404	21460.4	39085.5	0.549062		32965	32521.5	1.01363	43047.7	24837.3	1.73319		12484.9	50092.8	0.249235	41529.4	51765	0.802268
	8175.37	60597.9	0.134912	26362.8	35551.9	0.741529		31727.7	54564.4	0.581471	22160.8	31266.9	0.708761		2458.03	52434.1	0.0468785	27816.2	40410.8	0.688337
	1665.4	54635.5	0.030482	65858.2	34095.2	1.9316		11215	44816.4	0.250242	19544.9	32225.1	0.606512		28621.1	44462.5	0.643714	24229.8	43155.8	0.561449
	130.213	51798.2	0.00251385	562.598	36021.7	0.0156183		25977.9	36960	0.702867	34820.8	34214.4	1.01772		23668.2	39910.7	0.59303	35912.1	45807.7	0.783974
	35792.6	59149.9	0.605117	15817	25836.3	0.6122		29057.5	59868.4	0.485357	19758.8	37843	0.522124		10051.3	45940.5	0.21879	26948	52222	0.516027
	11191.3	57093.7	0.196016	17333.3	34653.5	0.500189		17615.4	58042.7	0.30349	24993.4	32537.9	0.768132		36435.9	54868.4	0.66406	15314.6	56039.4	0.273284
average			0.162854			0.725033				0.556177			0.892741				0.402618			0.604223
	RYE	A	B	C	average	SD	SEM
	iso	0.162854	0.556177	0.402618	0.373883	0.161854	0.0934463
	sss	0.725033	0.892741	0.604223	0.740665	0.118304	0.068303
	p Value	0.0366526

## Sheet: iso cf ins
2013-05-20	iso			insomniac			11/30/2013'	iso			insomniac			11/30/2013'	iso			insomniac
A	RYE	MAPK	ratio	RYE	MAPK	ratio	B	RYE	Actin	ratio	RYE	Actin	ratio	C	RYE	Actin	ratio	RYE	Actin	ratio
	1992.71	43699.3	0.0456006	6628.47	24938.2	0.265796		29158.7	63219.8	0.461228	16142.2	51118.8	0.315779		16965	61299.4	0.276755	34189.7	46294	0.738535
	21456.6	42876.5	0.500428	56619.1	47713.9	1.18664		27956.7	63618.1	0.439445	59131.6	59963	0.986135		38175	60635.6	0.629581	34716.8	58802.1	0.590401
	12201	35138.3	0.347229	17257.7	44994.8	0.383549		9212.08	56551	0.162899	4585.98	60636.1	0.0756313		32513.3	53853.3	0.603739	43823.5	56775.2	0.771877
	21105.7	24787.4	0.851469	90879.6	37796.6	2.40444		1701.74	60065.9	0.0283312	10001.6	65346.9	0.153054		22005.9	55572.3	0.395987	33988.9	62403.1	0.544666
	44739.1	45564	0.981896	32342	48533.7	0.666382		12044	63801.3	0.188774	49415.8	60965	0.810561		38849.9	63277.4	0.613962	23519.7	58085	0.404918
	23789.1	55677.6	0.427265	9208.49	24980.2	0.368632		14284	64337.9	0.222015	6059.71	62445.4	0.0970402		3528.05	60448	0.0583651	23496.5	61371.6	0.382857
average			0.525648			0.879239				0.250449			0.406367				0.429732			0.572209
	RYE	A	B	C	average	SD	SEM
	iso	0.525648	0.250449	0.429732	0.401943	0.114055	0.0658497
	ins	0.879239	0.406367	0.572209	0.619272	0.195897	0.113101
p Value	0.0430297
