# Supplementary material for: Identification of Redeye, a new sleep-regulating protein whose expression is modulated by sleep amount
Source: eLife. 2014 Feb 4;3:e01473. doi: 10.7554/eLife.01473 (PMC3912633; doi:10.7554/eLife.01473)
Supplement: Figure 8—Source data 1. — DOI: http://dx.doi.org/10.7554/eLife.01473.023 [file elife01473s007.xlsx]

## Sheet: Sheet1
			Densitometry quantification of RYE expression after SD: Figure7B_source_data.xlsx
			female	RYE	MAPK	ratio	RYE	male	RYE	MAPK	ratio	RYE
			ZT0	20455	78227.9	0.26148	0.999999	ZT0	5499.24	56385	0.0975302	1
			ZT5	62809.8	66213.8	0.948591	3.62778	ZT5	41655.6	67164.5	0.620203	6.3591
			SD0	34198.5	59992.4	0.570047	2.18008	SD0	31544	67198.9	0.469413	4.81301
			SD5	23002.2	50332.9	0.457	1.74774	SD5	16547.9	46053.7	0.359318	3.68418
			female	RYE	MAPK	ratio	RYE	male	RYE	MAPK	ratio	RYE
			ZT0	8321.12	30629.9	0.271666	1	ZT0	6108.87	37139.3	0.164485	1
			ZT5	72737.5	26503	2.7445	10.1025	ZT5	32823.1	25960.6	1.26434	7.68668
			SD0	24130.5	39965.3	0.603787	2.22253	SD0	31132.5	28342.1	1.09846	6.67815
			SD5	14772.7	27317.1	0.540786	1.99063	SD5	4252.24	13479.2	0.315467	1.91791
			male	RYE	MAPK	ratio	RYE
			ZT0	453.355	29982.2	0.0151208	0.999986
			SD0	2925.12	37779.4	0.0774261	5.12044
			ZT5	11450.8	31159.2	0.367493	24.3035
			SD5	482.477	29909.3	0.0161313	1.06682
								average	stdev	SE
		ZT0	0.999999	1	1	1	0.999986	0.999998	6.99884e-06	3.12997e-06
		ZT5	3.62778	6.3591	10.1025	7.68668	24.3035	10.4159	8.10784	3.62593
		SD0	2.18008	4.81301	2.22253	6.67815	5.12044	4.20284	1.95925	0.876203
		SD5	1.74774	3.68418	1.99063	1.91791	1.06682	2.08146	0.967546	0.4327
				non-deprived	sleep deprived		SE	SE
			ZT0	0.999998	4.20284		3.12997e-06	0.876203
			ZT5	10.4159	2.08146		3.62593	0.4327
